# Supplementary material for: Antimicrobial Resistance and Molecular Epidemiology of Corynebacterium striatum Isolated in a Tertiary Hospital in Turkey
Source: MDPI journal article supplement (doi:10.3390/pathogens9020136), 2020-02-19
Supplement: s1 [file s1]

Table S1. Distributions of *C. striatum* strains isolated from patients according to the age groups and genders n (%)

| Age groups (years) | Female (n = 39) | Male (n = 42) | Total     |
|--------------------|-----------------|---------------|-----------|
| 40–59              | 5 (12.8)        | 7 (16.7)      | 12(14.8)  |
| 60–79              | 18 (46.2)       | 24 (57.1)     | 42 (51.9) |
| ≥80                | 16 (41)         | 11 (26.2)     | 27(33.3)  |
| Total              | 39(100)         | 42 (100)      | 81(100)   |

$P = 0.366$  (Pearson's chi-squared test)

Table S2. Distributions of genotyped and sporadic *C. striatum* strains according to intensive care units and wards n (%)

| Strains   | Intensive care units (n = 68) | Wards (n = 13) | Total     |
|-----------|-------------------------------|----------------|-----------|
| Genotyped | 33 (48.5)                     | 3 (23.1)       | 36 (44.4) |
| Sporadic  | 35 (51.5)                     | 10(76.9)       | 45 (55.6) |
| Total     | 68 (100)                      | 13 (100)       | 81 (100)  |

$P = 0.091$  (Fisher's exact test)

Table S3: Distribution of genotyped and sporadic *C. striatum* strains according to the age groups n (%)

| Age groups (years) | Genotyped (n = 36) | Sporadic (n = 45) | Total     |
|--------------------|--------------------|-------------------|-----------|
| 40–59              | 3 (8.3)            | 9 (20)            | 12(14.8)  |
| 60–79              | 23 (63.9)          | 19 (42.2)         | 42 (51.9) |
| ≥80                | 10 (27.8)          | 17 (37.8)         | 27(33.3)  |
| Total              | 36 (100)           | 45 (100)          | 81(100)   |

$P = 0.120$  (Fisher's exact test)
